1 **Dual-energy X-ray absorptiometry derived knee shape may provide a useful imaging**  
2 **biomarker for predicting total knee replacement: findings from a study of 37,843 people in**  
3 **UK Biobank.**

4 Dr Rhona A Beynon<sup>1</sup>, Dr Fiona R Saunders<sup>2</sup>, Dr Raja Ebsim<sup>3</sup>, Dr Monika Frysz<sup>1,4</sup>, Dr Benjamin  
5 G Faber<sup>1</sup>, Dr Jennifer S Gregory<sup>2</sup>, Dr Claudia Lindner<sup>3</sup>, Dr Aliya Sarmanova<sup>1</sup>, Prof Richard M  
6 Aspden<sup>2</sup>, Prof Nicholas C Harvey<sup>5,6</sup>, Prof Timothy Cootes<sup>3</sup>, Prof Jonathan H Tobias<sup>1,4</sup>.

7

8 <sup>1</sup>University of Bristol, Musculoskeletal Research Unit, Bristol Medical School, Bristol, United  
9 Kingdom.

10 <sup>2</sup>University of Aberdeen, Centre for Arthritis and Musculoskeletal Health, Aberdeen, United  
11 Kingdom.

12 <sup>3</sup>The University of Manchester, Division of Informatics, Imaging & Data Sciences,  
13 Manchester, United Kingdom.

14 <sup>4</sup>University of Bristol, Medical Research Council Integrative Epidemiology Unit, Bristol,  
15 United Kingdom.

16 <sup>5</sup>University of Southampton, MRC Lifecourse Epidemiology Centre, Southampton, United  
17 Kingdom.

18 <sup>6</sup> NIHR Southampton Biomedical Research Centre, University of Southampton and University  
19 Hospital Southampton NHS Foundation Trust, United Kingdom.

20

21 Corresponding author: Dr Rhona A Beynon, email: [Rhona.beynon@bristol.ac.uk](mailto:Rhona.beynon@bristol.ac.uk)

22 We confirm that there are no conflicts of interest associated with this manuscript, including

23 **NOTE: This preprint reports new research that has not been certified by peer review and should not be used to guide clinical practice.**  
any financial support or benefits from commercial sources.

24 **Abstract**

25 **Objective:** We developed a novel imaging biomarker derived from knee dual-energy x-ray  
26 absorptiometry (DXA) to predict subsequent total knee replacement (TKR). The biomarker is  
27 based on knee shape, determined through statistical shape modelling. It was developed and  
28 evaluated using data and scans from the UK Biobank cohort.

29 **Methods:** Using a 129-point statistical shape model (SSM), knee shape (B-score) and  
30 minimum joint space width (mJSW) of the medial joint compartment (binarized as above or  
31 below the first quartile) were derived. Osteophytes were manually graded in a subset of  
32 DXA images. Cox proportional hazards models were used to examine the associations of B-  
33 score, mJSW and osteophyte score with the risk of TKR, adjusted for age, sex, height and  
34 weight.

35 **Results:** The analysis included 37,843 individuals (mean 63.7 years). In adjusted models, B-  
36 score and mJSW were associated with TKR: a standard deviation increase in B-score was  
37 associated with a hazard ratio (HR) of 2.32 (2.13, 2.54), and a lower mJSW with a HR of 2.21  
38 (1.76, 2.76). In the 6,719 images scored for osteophytes, mJSW was replaced by osteophyte  
39 score in the most strongly predictive model for TKR. In subsequent ROC analyses, a model  
40 combining B-score, osteophyte score, and demographic variables had superior  
41 discrimination (AUC=0.87) in predicting TKR at five years compared with a model with  
42 demographic variables alone (AUC=0.73).

43 **Conclusions:** An imaging biomarker derived from knee DXA scans reflecting knee shape and  
44 osteophytes, in conjunction with demographic factors, could help identify those at high risk  
45 of TKR, in whom preventative strategies should be targeted.

## 46 Introduction

47 Knee osteoarthritis (kOA) exhibits distinct radiological features, including osteophyte  
48 formation and joint space narrowing (JSN), the latter primarily affecting the medial joint  
49 compartment in primary kOA. Additionally, the condition is associated with characteristic  
50 shape alterations, including varus and valgus alignment, which can both result from and  
51 contribute to the disease (1-3).

52 Currently, Joint Space Width (JSW) is the only accepted biomarker for kOA progression in  
53 therapeutic trials (4, 5). However, grading systems such as the Kellgren-Lawrence system  
54 (6), which incorporates both osteophytes and JSN into a single severity scale, are often used  
55 in epidemiological studies. While the Kellgren-Lawrence grading system provides a valuable  
56 tool for defining kOA in research, it has limitations in predicting clinical outcomes, as  
57 evidenced by its weak association with pain and function (7, 8) and its limited sensitivity to  
58 change (9, 10). As a consequence, it is not commonly employed in clinical practice. Indeed,  
59 studies have shown that preoperative radiographs evaluated using the Kellgren-Lawrence  
60 system often underestimate the severity of kOA (11). This underscores the need to consider  
61 additional factors beyond the scope of the grading system, with knee shape emerging as a  
62 potential influential factor in the progression of the disease.

63 Statistical shape modelling (SSM), facilitated by machine learning techniques, holds the  
64 potential to enhance the prediction of osteoarthritis progression by identifying distinct joint  
65 shape features that are associated with adverse clinical outcomes. However, the application  
66 of this method in the context of the knee remains relatively unexplored, with existing  
67 studies primarily focusing on three-dimensional (3D) imaging modalities (12-14). For  
68 example, Bowes et al. developed the B-score to capture femoral shape changes in kOA on

69 MRI images (14). Elevated B-scores were associated with a 60% increased risk of TKR and its  
70 predictive ability was comparable to that of the Kellgren-Lawrence grade.

71 DXA imaging is gaining interest for joint shape evaluation due to its advantages of low  
72 radiation exposure and cost, and widespread availability. Moreover, modern high-resolution  
73 DXA scanners generate high-quality images similar to radiographs, making it a viable option  
74 for screening individuals at high risk of osteoarthritis progression. Observed shape variations  
75 on hip DXA, including reduced acetabular coverage and cam morphology, have already been  
76 linked to advanced disease (15, 16) and statistical shape modes have identified changes in  
77 hip shape that are linked to disease progression (17). While the use of knee DXA scans in  
78 assessing KOA has not been extensively investigated, a study successfully used SSM to  
79 capture alterations in knee morphology in a small cohort of KOA patients through sequential  
80 DXA images spanning 6–12 months (10).

81 In this study, we aimed to investigate the potential utility of knee DXA scans as a screening  
82 tool for identifying individuals with KOA who are at a high risk of progressing to total knee  
83 replacement (TKR), based on evaluating knee shape. To achieve this, we developed and  
84 subsequently applied a statistical shape model to approximately 40,000 knee DXA scans  
85 from UK Biobank (UKB). We examined the relationship between knee shape, quantified by  
86 B-score, and risk of subsequent TKR. Additionally, we explored whether any predictive value  
87 of B-score could be improved by incorporating additional features obtained from knee DXA  
88 scans. Specifically, we examined the inclusion of minimum joint space width (mJSW) and  
89 osteophyte classification (available in a subset of approximately 7,000 scans) along with  
90 conventional risk factors, namely age, sex, height, and weight.

## 91 **Materials and methods**

### 92 *Participants*

93 We used data from the UKB extended imaging study (18), a large-scale research study that  
94 aims to collect and analyse medical imaging data, including DXA scans, from approximately  
95 100,000 participants in the UKB cohort (19). At both baseline and imaging visits, UKB  
96 participants completed a touch-screen questionnaire, underwent a nurse-lead interview,  
97 and had physical measurements taken. Further information was obtained via data linkage,  
98 including hospital episode statistics (HES) (20).

99 All subjects provided written informed consent before participation. UKB has full ethical  
100 approval from the National Information Governance Board for Health and Social Care and  
101 the North-West Multi-Centre Research Ethics Committee (11/NW/0382). Permission to  
102 access and analyse UKB data for this study was approved under UKB application number  
103 17295.

### 104 *Acquisition of Knee DXA images*

105 DXA scans were acquired using a Lunar iDXA scanner (GE Healthcare), with participants in a  
106 non-weight bearing supine position (21). High-resolution DICOM format images were  
107 downloaded from the UKB showcase (downloaded in April 2021). Individuals with prior TKR  
108 were excluded from the analysis.

### 109 *Ascertainment of outcomes*

110 Our primary outcome of interest was TKR. Additionally, we examined cases of hospital-  
111 diagnosed knee osteoarthritis (HES-kOA), as a secondary outcome. Both outcomes were  
112 identified via linkage to the HES database (see Supplementary Table 1 for a list of the

113 diagnostic codes). All UKB participants were linked, both prospectively and retrospectively  
114 at baseline. Records begin on April 1st, 1997, and the data were downloaded in October  
115 2022 (capturing information up until the end of December 2021).

#### 116 *Assessment of covariates*

117 Participants' height and weight were measured prior to imaging using standardised  
118 procedures (22). Age and sex were collected at the time of enrolment into UKB and were  
119 self-reported.

#### 120 *Statistical shape modelling*

121 The SSM techniques employed in this study have been described elsewhere (23, 24) and  
122 additional information is provided in the Supplementary Methods. SSM was performed  
123 using software developed at The University of Manchester (25). A 129-point template was  
124 developed, covering the left distal femur, proximal tibia, proximal fibula, and superior  
125 patella, and excluding any osteophytes (Supplementary Figure 1). An automatic  
126 BoneFinder® (26) search model was trained (using 6,718 images from an initial pool of 7,000  
127 images) to apply the template to new images. The accuracy of the search model was  
128 evaluated using 3-fold cross-validation experiments (Supplementary Table 2). The  
129 BoneFinder® model was applied to the remaining left knee DXA images (n=31,207; see  
130 Supplementary Methods) to automatically place the points. When necessary (for 4,214  
131 images), trained annotators (RB and FS) manually corrected point placements to improve  
132 the precision of the SSM (Supplementary Table 3).

133 The first 27 statistical knee shape modes (KSMs) obtained from SSM were standardized  
134 using the sample standard deviation. To limit multiple comparisons, we focused on the first

135 10 KSMs, explaining 79.5% of shape variance. Subsequent KSMs each made minimal  
136 contributions to the sample variance ( $\leq 2\%$ ) (Supplementary Figure 2).

137 *Generation of a quantitative measure of knee shape: B-score*

138 A knee shape variable was created using all KSMs from the SSM. A vector representing the  
139 line connecting the mean knee joint shape of a "healthy" population and that of a  
140 "diseased" population was generated for each outcome. The KSMs for each image were  
141 projected onto this vector to obtain the B-Score (14). Each B-score unit represents one  
142 standard deviation (SD) from the mean knee joint shape of the healthy population (assigned  
143 a B-score of 0). As well as calculating B-scores for the entire population, sex-specific B-scores  
144 were derived for sensitivity analysis (Supplementary Methods).

145 *DXA-based measures of joint space and osteophytes*

146 A custom script automatically measured mJSW of the medial and lateral compartments  
147 using specific template points on the distal femur and proximal tibia (Supplementary  
148 Methods). Medial mJSW values were divided into quartiles, and a binary variable was  
149 generated to compare the first quartile against the second, third and fourth.  
150 Osteophytes were assessed in a subset of 6,719 DXA images, selected from the initial pool  
151 of 7,000 images designated for the search training set (see Supplementary Methods). Using  
152 a DXA-based reference Atlas (Supplementary Document), we initially conducted visual  
153 grading on a 0-3 scale. We then computed cumulative values (ranging from 0 to 12) by  
154 aggregating grades from all four sites on the medial and lateral aspects of the femur and  
155 tibia. An osteophyte score was then assigned based on the total sum: 0 (sum = 0), 1 (sum =  
156 1), 2 (sum = 2-3), 3 (sum = 4 or greater), as outlined in Supplementary Table 4.

157 *Statistical analysis*

158 We employed Cox proportional hazards modelling and logistic regression to assess the  
159 relationships between KSMs, B-scores, mJSW, and osteophytes with the incidence of TKR  
160 and HES-kOA, respectively. The proportional hazards assumption was verified using the  
161 Schoenfeld residuals approach. Results are reported as hazard ratios (HRs) and odds ratios  
162 (ORs) with their corresponding 95% confidence intervals (CIs). Both unadjusted and adjusted  
163 analyses were conducted, with adjustments made for age, sex, height, and weight. Age,  
164 height, and weight were treated as continuous variables, while sex was considered as a  
165 binary variable. Where death occurred before TKR, the event was censored at the time of  
166 death.

167 To evaluate the predictive performance of the models for TKR and HES-KOA, we used the  
168 Harrell's Concordance index (C-index) and area under the receiver operating characteristic  
169 curve (AUC), in combination with Akaike information criterion (AIC) and Bayesian  
170 information criterion (BIC). Initially, we ran univariate models for B-score, mJSW, and  
171 osteophyte score using the subset of participants with osteophyte data (n=6,719). We then  
172 examined a model incorporating the demographic factors age, sex, height, and weight as  
173 additional variables. Subsequently, we evaluated models including an extra variable, either  
174 B-score, mJSW, or osteophyte score, depending on the specific model. Finally, we developed  
175 a comprehensive model incorporating all DXA-derived variables and demographic factors.  
176 Goodness of fit was evaluated using AIC and BIC, while discriminative ability was assessed  
177 using AUC or C-index for logistic and Cox regression models, respectively.



178 To further evaluate the discriminative ability of the models, we plotted receiver operating  
179 characteristic (ROC) curves for HES-kOA and TKR at 5 years. Chi-squared tests were  
180 employed to examine the equality of the area under the curves.

181 Analyses were conducted using Stata version 17 (StataCorp. 2021. *Stata Statistical Software:  
182 Release 17*. College Station, TX: StataCorp LLC.) and python 3.10.5.

## 183 **Results**

### 184 *Participant characteristics*

185 In total 37,843 participants had SSM and clinical data available (Figure 1). A total of 358  
186 participants underwent TKR (1.0%; Table 1), with an average time to surgery of 2.1 years  
187 (SD=1.4 years; males= 2.2 years [1.5], females= 2.0 years [1.3]). There were 538 deaths  
188 during the study period. The sub-sample with osteophyte data (n=6,719) were comparable  
189 with respect to their baseline demographics (Table 1), but the proportion of individuals with  
190 TKR was slightly higher (1.6%, n=110). The average time to TKR in this cohort was 2.6 years  
191 [SD: 1.5; males: 3.0 [1.5], females: 2.3 [1.4]) and there were 93 deaths.

### 192 *Relationship between knee shape and kOA outcomes.*

193 We initially evaluated individual modes of variation (KSMs) in relation to kOA outcomes.  
194 Adjusted analyses results are presented in Table 2, while unadjusted associations can be  
195 found in Supplementary Table 5. A description of each KSM is provided in Supplementary  
196 Table 6.

197 KSMs 7, 8, and 9 showed strong evidence of an association with TKR. Specifically, for each  
198 standard deviation (SD) increase in KSM9 there was a 19% reduced risk of TKR, while

199 analogous increases in KSM7 and KSM8 were associated with a 45% and 69% increased risk,  
200 respectively.

201 Five KSMs displayed strong statistical evidence of an association with HES-kOA. Increases in  
202 modes 1, 9, and 10 were linked to reduced risks of 8%, 10%, and 8%, whilst increases in  
203 modes 7 and 8 were associated with a 26% and 32% increased risk, respectively.

204 Given that variations in knee shape could be spread over multiple modes, we next assessed  
205 the relationship between B-score, a single variable combining shape information across all  
206 KSMs, and kOA outcomes. B-score distribution is shown in Supplementary Figure 3.

207 We observed strong positive associations between B-scores and our outcomes (Figure 2;  
208 additional data in Supplementary Table 7). After adjustment, each SD increase in B-score  
209 was associated with a 2.3-fold higher risk of TKR (HR=2.32 [2.13, 2.54]). Similar results were  
210 found in the sex-stratified analysis (Supplementary Table 7). Additionally, each SD increase  
211 in B-score was associated with increased odds of HES-kOA, with an OR of 1.80 (1.71, 1.89).  
212 Stratifying by sex did not alter these findings.

213 Figure 3 depicts joint shape variations associated with B-scores  $\pm 2SD$  from the healthy group  
214 mean. An increase in B-score is linked with increasing varus alignment accompanied by  
215 reduced medial joint space width, widening of the femoral articular surface, lateral patellar  
216 displacement, and a potential upward displacement of the fibular head.

#### 217 *Relationship between mJSW and kOA outcomes*

218 Results are presented in Supplementary Table 8. Individuals in the first quartile of medial  
219 mJSW, representing the narrowest mJSW, had a 2.4-fold increased risk of TKR and a 54%  
220 higher risk of HES-kOA, compared with those in the fourth quartile (HR for TKR = 2.44 [1.77

221 to 3.38]; OR for HES-kOA = 1.54 [1.31 to 1.81]). Conversely, when examining lateral mJSW,  
222 the first and second quartiles showed a lower risk of TKR when compared with the fourth.  
223 Considering the binary mJSW variable, individuals in the first quartile on the medial side had  
224 a 2.2-fold higher risk of TKR (HR=2.21 [1.76, 2.76]), compared with individuals in higher  
225 quartiles. They also experienced a 48% increased risk of HES-kOA (OR=1.48 [1.31, 1.67]), as  
226 depicted in Figure 2.

### 227 *Relationship between osteophytes and kOA outcomes*

228 Supplementary Table 9 displays the prevalence of manually graded osteophytes(n=6,719).  
229 The regression analysis (Table 3, with unadjusted results in Supplementary Table 10)  
230 revealed a consistent pattern of increasing HRs and ORs for kOA outcomes with higher  
231 osteophyte grades. This was apparent across all anatomical sites.

232 An osteophyte score of 3 (based on the sum of the osteophyte grades) was associated with  
233 an 18-fold increased risk of TKR (HR=18.30 [9.98, 33.57]), and a 9-fold increased risk of HES-  
234 kOA (OR=9.10 [6.54, 12.67]) compared to a score of 0 (Supplementary Table 11). Figure 2  
235 visually depicts the incremental impact per unit increase in the osteophyte score.

### 236 *Performance of multivariable models in predicting TKR*

237 Table 4 displays the predictive performance of different models for TKR, combining  
238 demographic variables (age, sex, height and weight), B-score, binary mJSW and osteophyte  
239 score in the sub-group of 6,719 participants.

240 When assessing the B-score's relationship with TKR, the univariable model yielded a HR of  
241 2.67 (2.25, 3.17), which decreased to 2.40 (2.00, 2.87) upon adjustment for demographic  
242 variables. Adding osteophyte score had a greater impact compared to mJSW, resulting in

243 HRs of 1.80 (1.50, 2.15) and 2.29 (1.89, 2.76) respectively. Combining mJSW, osteophyte  
244 score, B-score, and demographics resulted in a HR of 1.72 (1.42, 2.09).

245 The unadjusted HR for the mJSW-TKR association was 2.81 (1.94, 4.09), which decreased to  
246 2.29 (1.54, 3.41) after incorporating demographic variables. Adding B-score to the latter  
247 model had a more pronounced effect compared to osteophyte score, with HRs of 1.36 (0.90,  
248 2.05) and 1.91 (1.29, 2.82), respectively. The addition of both B-score and osteophyte score  
249 yielded an HR of 1.29 (0.85, 1.96).

250 In the context of the osteophyte-TKR association, the unadjusted hazard ratio (HR) was 3.42  
251 (2.78, 4.19) per unit increase, decreasing to 2.92 (2.37, 3.60) after adjusting for  
252 demographics. Adding mJSW further reduced the HR to 2.82 (2.30, 3.48), while the inclusion  
253 of B-score had a more substantial impact, resulting in a HR of 2.35 (1.90, 2.90). Similar  
254 effects were observed in the model including both B-score and mJSW, alongside  
255 demographic variables (HR = 2.34 [1.89, 2.89]).

256 The model that exhibited the optimal fit, as indicated by the lowest AIC and BIC, and the  
257 highest discrimination as reflected by C-index, comprised B-score, osteophyte score and  
258 demographics.

259 We subsequently examined the predictive ability of this model in classifying TKR at five  
260 years. A model including demographic factors alone achieved an AUC of 0.73 (Figure 4),  
261 while the optimal model (including B-score, osteophyte score and demographics) had an  
262 AUC of 0.87 ( $p < 0.05$ ).

263 *Performance of multivariable models in predicting HES-kOA*

264 The associations between DXA-derived variables and HES-kOA were generally observed to  
265 be weaker when compared with those with TKR (Table 4).

266 The B-score- HES-kOA association partially attenuated when demographic variables were  
267 included in the model, with the OR decreasing from 1.98 (1.78, 2.20) to 1.85 (1.66, 2.07).

268 Additional adjustment for mJSW had minimal impact (OR=1.82 [1.63, 2.04]), but  
269 incorporating osteophyte score further reduced the association (OR=1.59 [1.42, 1.77]).

270 Including both mJSW and osteophyte score in the model resulted in a comparable OR to the  
271 model that adjusted for osteophyte score and demographics (OR=1.57 [1.40, 1.76]).

272 When considering mJSW, adjusting for demographic variables reduced the strength of the  
273 association, causing the OR to shift from 1.65 (95% CI: 1.31, 2.07) to 1.55 (95% CI: 1.21,

274 1.98). Further adjustment for B-score led to a more pronounced attenuation, yielding an  
275 odds ratio (OR) of 1.15 (95% CI: 0.89, 1.48), in contrast to the adjustment for osteophyte

276 score which produced an OR of 1.44 (95% CI: 1.13, 1.84). Including both B-score and

277 osteophyte score produced an OR similar to the model adjusting for demographics and B-  
278 score alone (OR = 1.13 [0.87, 1.46]).

279 Osteophyte score exhibited the strongest association with HES-kOA, with an OR of 2.19  
280 (1.97, 2.44) in univariable analyses and 2.02 (1.81, 2.26) after adjusting for demographics.

281 Adding mJSW as an additional adjustment did not change the estimate (OR=2.00 [1.79,  
282 2.24]), but partial attenuation occurred when B-score was added (OR=1.80 [1.60, 2.01]). The

283 model with B-score, mJSW, and demographics was comparable to the one with B-score and  
284 demographics (OR=1.79 [1.60, 2.01]).

285 As seen for TKR, the model that exhibited the optimal fit and discrimination comprised the  
286 B-score, osteophyte score and demographic variables. When considering demographic  
287 variables alone, the model yielded an AUC of 0.64. However, when the B-score and  
288 osteophyte score were incorporated into the model, the AUC improved to 0.75.

## 289 **Discussion**

290 The purpose of this study was to develop an imaging biomarker derived from knee DXA  
291 scans which incorporates joint shape and to investigate its potential prognostic value in  
292 predicting TKR. In addition to capturing conventional features of radiographic KOA, namely  
293 JSN (as reflected by mJSW) and osteophytes, an automated model was developed to extract  
294 knee shape information using SSM. This information was quantified as a B-score. We found  
295 strong correlations between all of the DXA-derived features investigated and subsequent  
296 risk of TKR. Similar, although comparatively weaker associations were observed with HES-  
297 KOA. Furthermore, when we combined B-score with osteophyte score and demographic  
298 factors, we observed a significant improvement in the accuracy of predicting TKR at 5 years,  
299 compared with demographic risk factors alone (AUC=0.87 compared with 0.73).

300 Few studies have examined knee shape using DXA-based SSM. One small study explored  
301 knee shape changes in 109 individuals over 12 months. It found significant alterations in a  
302 particular shape mode reflecting reduced medial mJSW in KOA cases, which aligns with our  
303 findings (10). However, this investigation did not annotate osteophytes separately or  
304 observe overall shape changes like varus alignment. In contrast, our analysis revealed a  
305 strong relationship between DXA-derived osteophytes and subsequent joint replacement,  
306 consistent with our previous hip DXA study (16). Our findings also align with an earlier  
307 radiographic hip investigation which found that incorporating an SSM-derived Shape-Score

308 into a model alongside demographic factors, clinical assessment, and radiologists scores  
309 enhanced the prediction of hip OA (27). The initial prediction model had an AUC of 0.795,  
310 which improved to 0.864 with the inclusion of the Shape-Score.

311 The observed trend toward varus alignment in individuals with HES-kOA and subsequent  
312 TKR in our study is consistent with the recognised varus malalignment characteristic in kOA  
313 (1, 2). This malignment may be a predisposing factor, focusing weight-bearing forces  
314 through the medial compartment causing considerable biomechanical stress. Alternatively,  
315 varus may develop due to medial JSN, a recognized feature of primary kOA. Alongside the  
316 varus alignment and reduced mJSW, there appeared to be an enlargement of the femoral  
317 articular surface. These findings coincide with previous studies using MRI-based SSM  
318 approaches, which have reported femoral condyle widening and flattening in osteoarthritic  
319 knees (13, 28-30).

320 By employing a B-score, we were able to examine independent associations between knee  
321 shape and other features related to kOA, namely mJSW and osteophytes. Whereas B-score,  
322 osteophytes and mJSW were all related to TKR and HES-kOA in univariable analyses, the  
323 association between mJSW and these outcomes attenuated following inclusion of B-score,  
324 suggesting that mJSW is encompassed by the SSM and the resulting B-score. In contrast, B-  
325 score and osteophyte score were both retained as independent predictors of clinical  
326 outcomes, and their combination increased model performance. That said, the association  
327 between osteophytes and risk of TKR/HES-kOA was partially attenuated by inclusion of B-  
328 score. Since our SSM template excluded osteophytes, these are unlikely to have directly  
329 contributed to the B-score, suggesting that joint malalignment may contribute to the  
330 relationship between osteophytes and kOA progression, as previously proposed (31).

331 Demographic factors such as age, sex, and weight also strongly predicted risk of TKR/HES-  
332 KOA, implying imaging biomarkers need to be considered as complementing these factors in  
333 patient assessment rather than replacing them.

334 The exclusion of participants with previous TKR allowed us to assess the predictive capability  
335 of DXA-derived imaging biomarkers for future TKR. On the other hand, participants could  
336 have had pre-existing HES-KOA at the time of their DXA scan. It was reassuring that broadly  
337 consistent relationships were seen between imaging biomarkers and HES-KOA and TKR.  
338 Nonetheless, given we were only able to examine cross-sectional relationships with HES-  
339 KOA, further studies are necessary to determine whether DXA biomarkers are also useful in  
340 predicting subsequent HES-KOA when obtained in those with early disease.

341 Several approaches have been used to extract additional features on knee images for OA  
342 diagnosis and prognosis, including Deep Learning methods, as has previously been applied  
343 to knee radiographs (32-34). Our investigation is novel in exploring whether an imaging  
344 biomarker incorporating knee shape might be useful in predicting TKR when applied to knee  
345 DXA scans. This was made possible by application of SSM to DXA images obtained from a  
346 large sample of individuals from UKB, in whom follow-up data for THR via HES linkage was  
347 available. Given the study's scale, our SSM could serve as a reference model, making  
348 replication, validation and clinical application more feasible. Indeed, the SSM, along with the  
349 BoneFinder search model, will be made publicly available on the BoneFinder website.

350 Another strength of our study is that, unlike the majority of previous studies using SSM to  
351 characterise knee shape, which generally focused on the tibia and femur, our SSM also  
352 incorporated the superior patella and fibula.



353 A limitation of our study is that whereas knee shape data were obtained in all those with  
354 available DXA scans, osteophytes, which required manual annotation, were only obtained in  
355 a subset. Nevertheless, this smaller sample had sufficient numbers of individuals with TKR to  
356 compare the predictive value of different models. A further limitation is that HES linkage  
357 may have missed some cases of TKR through failure to capture procedures performed in the  
358 private sector. Moreover, the HES data lacks laterality but this limitation is more likely to  
359 reduce effect sizes rather than introduce bias into the study. Lack of generalisability may  
360 also be an issue given UKB is 95% white and has lower rates of all-cause mortality compared  
361 with the population at large, which aligns with the well-known "healthy volunteer" effect  
362 (35). In addition, those 11% of UKB participants recruited from Scotland and Wales were  
363 excluded as they have separate systems to HES linkage. Finally, it is important to stress that  
364 the present study aimed to explore the utility of DXA-based measures of knee shape in  
365 predicting clinical outcomes related to KOA, and to evaluate whether these provide  
366 additional information compared to conventional radiographic measures, including JSW and  
367 osteophytes. Further studies, including validation in an external dataset, are required to  
368 establish the generalizability and reliability of this approach prior to clinical use.

369 In summary, our study highlights the potential value of SSM as a tool for characterising joint  
370 shape in knee DXA scans. Importantly, the development of a DXA-derived imaging  
371 biomarker combining knee shape and osteophyte formation shows promise in identifying  
372 individuals at high risk of progression to TKR, particularly when combined with demographic  
373 factors. Further studies are justified to examine the utility of using DXA scans, which are  
374 widely available and involve much lower doses of radiation compared with conventional X-  
375 rays, to identify individuals who are likely to benefit from interventions aimed at slowing  
376 KOA progression.

377 **Acknowledgements**

378 The authors would like to express their gratitude to Dr. David Wilson, Consultant  
379 Interventional Musculoskeletal Radiologist and honorary Clinical Lecturer at Aberdeen  
380 University, for his valuable contribution to the development of the DXA-based osteophyte  
381 Atlas. They also extend their appreciation to all the participants of the UK Biobank study.

382 **Author contributions**

383 Each author has made significant contributions to the study's conception, design, data  
384 acquisition, analysis, and interpretation. Furthermore, all authors helped draft the article  
385 before approving the final version of this manuscript.

386 **Funding:** This research was funded in whole, or in part, by the Wellcome Trust [Grant  
387 numbers: 209233/Z/17/Z, 223267/Z/21/Z]. CL was funded by a Sir Henry Dale Fellowship  
388 jointly funded by the Wellcome Trust and the Royal Society (223267/Z/21/Z). NCH is  
389 supported by grants from Medical Research Council (MRC) [MC\_PC\_21003; MC\_PC\_21001]  
390 and the NIHR Southampton Biomedical Research Centre. BGF is funded by an NIHR  
391 Academic Clinical Lectureship.

392 **Conflict of Interest:** The other authors have declared no conflicts of interest. For the  
393 purpose of open access, the author has applied a CC BY public copyright licence to any  
394 Author Accepted Manuscript version arising from this submission. AS was affiliated with the  
395 Bristol University at the time of the study conduct and is currently affiliated with Roche  
396 Diagnostics International, Clinical Development and Medical Affairs. At the time this work  
397 was conducted MF was an employee at the University of Bristol. MF is now employed by  
398 Boehringer Ingelheim UK & Ireland.

## 399 **References**

- 400 1. Brouwer GM, van Tol AW, Bergink AP, Belo JN, Bernsen RM, Reijman M, et al.  
401 Association between valgus and varus alignment and the development and progression of  
402 radiographic osteoarthritis of the knee. *Arthritis Rheum.* 2007;56(4):1204-11.
- 403 2. Sharma L, Song J, Dunlop D, Felson D, Lewis CE, Segal N, et al. Varus and valgus  
404 alignment and incident and progressive knee osteoarthritis. *Ann Rheum Dis.*  
405 2010;69(11):1940-5.
- 406 3. Hunter DJ, Zhang Y, Niu J, Tu X, Amin S, Goggins J, et al. Structural factors associated  
407 with malalignment in knee osteoarthritis: the Boston osteoarthritis knee study. *The Journal*  
408 *of Rheumatology.* 2005;32(11):2192-9.
- 409 4. Paixao T, DiFranco MD, Ljuhar R, Ljuhar D, Goetz C, Bertalan Z, et al. A novel  
410 quantitative metric for joint space width: data from the Osteoarthritis Initiative (OAI).  
411 *Osteoarthritis Cartilage.* 2020;28(8):1055-61.
- 412 5. Hunter DJ, Collins JE, Deveza L, Hoffmann SC, Kraus VB. Biomarkers in osteoarthritis:  
413 current status and outlook - the FNIH Biomarkers Consortium PROGRESS OA study. *Skeletal*  
414 *Radiol.* 2023.
- 415 6. Kellgren JH, Lawrence JS. Radiological assessment of osteo-arthrosis. *Ann Rheum Dis.*  
416 1957;16(4):494-502.
- 417 7. Bedson J, Croft PR. The discordance between clinical and radiographic knee  
418 osteoarthritis: a systematic search and summary of the literature. *BMC Musculoskelet*  
419 *Disord.* 2008;9:116.
- 420 8. Hannan MT, Felson DT, Pincus T. Analysis of the discordance between radiographic  
421 changes and knee pain in osteoarthritis of the knee. *J Rheumatol.* 2000;27(6):1513-7.

- 422 9. Sheehy L, Culham E, McLean L, Niu J, Lynch J, Segal NA, et al. Validity and sensitivity  
423 to change of three scales for the radiographic assessment of knee osteoarthritis using  
424 images from the Multicenter Osteoarthritis Study (MOST). *Osteoarthritis and Cartilage*.  
425 2015;23(9):1491-8.
- 426 10. Gregory JS, Barr RJ, Yoshida K, Alesci S, Reid DM, Aspden RM. Statistical shape  
427 modelling provides a responsive measure of morphological change in knee osteoarthritis  
428 over 12 months. *Rheumatology (Oxford)*. 2020;59(9):2419-26.
- 429 11. Abdelaziz H, Balde OM, Citak M, Gehrke T, Magan A, Haasper C. Kellgren-Lawrence  
430 scoring system underestimates cartilage damage when indicating TKA: preoperative  
431 radiograph versus intraoperative photograph. *Arch Orthop Trauma Surg*. 2019;139(9):1287-  
432 92.
- 433 12. Bredbenner TL, Eliason TD, Potter RS, Mason RL, Havill LM, Nicoletta DP. Statistical  
434 shape modeling describes variation in tibia and femur surface geometry between Control  
435 and Incidence groups from the osteoarthritis initiative database. *J Biomech*.  
436 2010;43(9):1780-6.
- 437 13. Lynch JT, Schneider MTY, Perriman DM, Scarvell JM, Pickering MR, Asikuzzaman M,  
438 et al. Statistical shape modelling reveals large and distinct subchondral bony differences in  
439 osteoarthritic knees. *J Biomech*. 2019;93:177-84.
- 440 14. Bowes MA, Kacena K, Alabas OA, Brett AD, Dube B, Bodick N, et al. Machine-  
441 learning, MRI bone shape and important clinical outcomes in osteoarthritis: data from the  
442 Osteoarthritis Initiative. *Ann Rheum Dis*. 2021;80(4):502-8.
- 443 15. Frysz M, Faber BG, Ebsim R, Saunders FR, Lindner C, Gregory JS, et al. Machine  
444 Learning-Derived Acetabular Dysplasia and Cam Morphology Are Features of Severe Hip  
445 Osteoarthritis: Findings From UK Biobank. *J Bone Miner Res*. 2022;37(9):1720-32.

- 446 16. Faber BG, Ebsim R, Saunders FR, Frysz M, Lindner C, Gregory JS, et al. A novel semi-  
447 automated classifier of hip osteoarthritis on DXA images shows expected relationships with  
448 clinical outcomes in UK Biobank. *Rheumatology (Oxford)*. 2022;61(9):3586-95.
- 449 17. Barr RJ, Gregory JS, Yoshida K, Alesci S, Aspden RM, Reid DM. Significant  
450 morphological change in osteoarthritic hips identified over 6-12 months using statistical  
451 shape modelling. *Osteoarthritis Cartilage*. 2018;26(6):783-9.
- 452 18. UK Biobank, Imaging Study; 2023 [cited 04.04.23]. Available from:  
453 <https://www.ukbiobank.ac.uk/explore-your-participation/contribute-further/imaging-study>.
- 454 19. UK Biobank, 2023 [cited 04.04.23]. Available from: <https://www.ukbiobank.ac.uk/>.
- 455 20. UK Biobank, Mapping Inpatient hospital data across England, Scotland and Wales,  
456 Vesion 1.5; 2019 [cited 06.04.23]. Available from:  
457 <https://biobank.ndph.ox.ac.uk/showcase/refer.cgi?id=146641>.
- 458 21. UK Biobank, Imaging modality DXA Version 1.0; 2015 [cited 04.04.23]. Available  
459 from: [https://biobank.ndph.ox.ac.uk/showcase/ukb/docs/DXA\\_explan\\_doc.pdf](https://biobank.ndph.ox.ac.uk/showcase/ukb/docs/DXA_explan_doc.pdf).
- 460 22. UK Biobank, Anthropometry, Version 1.0; 2014 [cited 31.07.23]. Available from:  
461 <https://biobank.ndph.ox.ac.uk/ukb/ukb/docs/Anthropometry.pdf>.
- 462 23. Cootes TF, Hill A, Taylor CJ, Haslam J. Use of active shape models for locating  
463 structures in medical images. *Image and Vision Computing*. 1994;12(6):355-65.
- 464 24. Gregory JS, Testi D, Stewart A, Undrill PE, Reid DM, Aspden RM. A method for  
465 assessment of the shape of the proximal femur and its relationship to osteoporotic hip  
466 fracture. *Osteoporos Int*. 2004;15(1):5-11.
- 467 25. The University of Manchester, UoMASM; [cited 25.08.23]. Available from:  
468 <https://sourceforge.net/projects/uomasm/>.
- 469 26. BoneFinder; 2015 [cited 09.08.2023]. Available from: <https://bone-finder.com/>.

- 470 27. Gielis WP, Weinans H, Welsing PMJ, van Spil WE, Agricola R, Cootes TF, et al. An  
471 automated workflow based on hip shape improves personalized risk prediction for hip  
472 osteoarthritis in the CHECK study. *Osteoarthritis Cartilage*. 2020;28(1):62-70.
- 473 28. Neogi T, Bowes MA, Niu J, De Souza KM, Vincent GR, Goggins J, et al. Magnetic  
474 resonance imaging-based three-dimensional bone shape of the knee predicts onset of knee  
475 osteoarthritis: data from the osteoarthritis initiative. *Arthritis Rheum*. 2013;65(8):2048-58.
- 476 29. Barr AJ, Dube B, Hensor EM, Kingsbury SR, Peat G, Bowes MA, et al. The relationship  
477 between three-dimensional knee MRI bone shape and total knee replacement-a case  
478 control study: data from the Osteoarthritis Initiative. *Rheumatology (Oxford)*.  
479 2016;55(9):1585-93.
- 480 30. Bowes MA, Vincent GR, Wolstenholme CB, Conaghan PG. A novel method for bone  
481 area measurement provides new insights into osteoarthritis and its progression. *Ann Rheum*  
482 *Dis*. 2015;74(3):519-25.
- 483 31. Felson DT, Gale DR, Elon Gale M, Niu J, Hunter DJ, Goggins J, et al. Osteophytes and  
484 progression of knee osteoarthritis. *Rheumatology (Oxford)*. 2005;44(1):100-4.
- 485 32. Tiulpin A, Thevenot J, Rahtu E, Lehenkari P, Saarakkala S. Automatic Knee  
486 Osteoarthritis Diagnosis from Plain Radiographs: A Deep Learning-Based Approach. *Sci Rep*.  
487 2018;8(1):1727.
- 488 33. Tiulpin A, Klein S, Bierma-Zeinstra SMA, Thevenot J, Rahtu E, Meurs JV, et al.  
489 Multimodal Machine Learning-based Knee Osteoarthritis Progression Prediction from Plain  
490 Radiographs and Clinical Data. *Sci Rep*. 2019;9(1):20038.
- 491 34. Nguyen HH, Saarakkala S, Blaschko MB, Tiulpin A. CLIMAT: Clinically-Inspired Multi-  
492 Agent Transformers for Knee Osteoarthritis Trajectory Forecasting. 2022 IEEE 19th  
493 International Symposium on Biomedical Imaging (ISBI); 2022; Kolkata, India.

494 35. Fry A, Littlejohns TJ, Sudlow C, Doherty N, Adamska L, Sprosen T, et al. Comparison  
495 of Sociodemographic and Health-Related Characteristics of UK Biobank Participants With  
496 Those of the General Population. *Am J Epidemiol.* 2017;186(9):1026-34.

497

## Tables

### Table 1: Descriptive characteristics of the total study population and the subset in which osteophytes were assessed.

The table presents the demographic and clinical characteristics of the study population, comprising all participants with statistical shape modelling data. The left-hand side provides information for the full dataset, while the right-hand side focuses on the sub-sample of participants who had additional osteophyte data available. Abbreviations: HES-kOA, hospital-diagnosed knee osteoarthritis; mJSW, minimum joint space width; SD, standard deviation; TKR, total knee replacement.



|                               | Full dataset      |                 |                  | Osteophyte subset |                |                 |
|-------------------------------|-------------------|-----------------|------------------|-------------------|----------------|-----------------|
|                               | Female<br>N=19710 | Male<br>N=18133 | Total<br>N=37844 | Female<br>N=3403  | Male<br>N=3316 | Total<br>N=6719 |
|                               | <i>Mean (SD)</i>  |                 |                  | <i>Mean (SD)</i>  |                |                 |
| Age (years)                   | 63.03 (7.41)      | 64.41 (7.64)    | 63.69 (7.55)     | 62.08 (7.25)      | 63.48 (7.65)   | 62.77 (7.48)    |
| Height (cm)                   | 163.64 (6.41)     | 177.23 (6.62)   | 170.15 (9.40)    | 163.36 (6.43)     | 176.90 (6.63)  | 170.04 (9.40)   |
| Weight (kg)                   | 68.11 (12.91)     | 83.08 (13.38)   | 75.29 (15.12)    | 68.79 (12.70)     | 83.65 (13.71)  | 76.12 (15.15)   |
| mJSW medial compartment (mm)  | 3.63 (0.60)       | 4.28 (0.71)     | 3.94 (0.73)      | 3.55 (0.70)       | 4.24 (0.81)    | 3.89 (0.83)     |
| mJSW lateral compartment (mm) | 3.78 (0.83)       | 4.65 (0.84)     | 4.20 (0.94)      | 3.97 (0.94)       | 4.82 (0.94)    | 4.39 (1.03)     |
| B-score TKR                   | -0.10 (0.99)      | 0.13 (1.02)     | 0.01 (1.01)      | -0.04 (1.02)      | 0.08 (1.01)    | 0.02 (1.01)     |
| B-score HES-kOA               | -0.14 (1.00)      | 0.21 (1.01)     | 0.03 (1.02)      | -0.05 (1.02)      | 0.13 (1.02)    | 0.04 (1.02)     |
|                               | <i>N (%)</i>      |                 |                  | <i>N (%)</i>      |                |                 |
| HES-kOA                       |                   |                 |                  |                   |                |                 |
| no                            | 19027 (96.53%)    | 17335 (95.60%)  | 36362 (96.08%)   | 3230 (94.92%)     | 3144 (94.81%)  | 6374 (94.87%)   |
| yes                           | 684 (3.47%)       | 798 (4.40%)     | 1482 (3.92%)     | 173 (5.08%)       | 172 (5.19%)    | 345 (5.13%)     |
| TKR                           |                   |                 |                  |                   |                |                 |
| no                            | 19526 (99.06%)    | 17960 (99.05%)  | 37486 (99.05%)   | 3341 (98.18%)     | 3268 (98.55%)  | 6609 (98.36%)   |
| yes                           | 185 (0.94%)       | 173 (0.95%)     | 358 (0.95%)      | 62 (1.82%)        | 48 (1.45%)     | 110 (1.64%)     |
| Osteophyte grade              |                   |                 |                  |                   |                |                 |
| grade 0-1                     |                   |                 |                  | 2423 (71.20%)     | 2456 (74.07%)  | 4879 (72.61%)   |
| grade 2-3                     |                   |                 |                  | 980 (28.80%)      | 860 (25.93%)   | 1840 (27.39%)   |

Table 2: Associations between the top 10 knee shape modes and knee osteoarthritis

outcomes.

Hazard ratios (HRs) and odds ratios (ORs) indicate the change in risk of total knee replacement (TKR) and hospital diagnosed knee osteoarthritis (HES-kOA) per standard deviation increase in knee shape mode (KSM). Models are adjusted for age, sex, height and weight. 95% confidence intervals (CI) are provided. Associations that met the Bonferroni-significant threshold of  $p \leq 0.005$  are shown in bold.

| TKR     |      |        |      |                 |
|---------|------|--------|------|-----------------|
| KSM     | HR   | 95% CI |      | p-value         |
| 1       | 0.89 | 0.81   | 0.99 | 0.03            |
| 2       | 1.12 | 1.01   | 1.24 | 0.04            |
| 3       | 1.06 | 0.95   | 1.19 | 0.28            |
| 4       | 0.87 | 0.78   | 0.97 | 0.01            |
| 5       | 1.08 | 0.97   | 1.19 | 0.16            |
| 6       | 0.87 | 0.78   | 0.97 | 0.01            |
| 7       | 1.45 | 1.31   | 1.62 | <b>4.47E-12</b> |
| 8       | 1.69 | 1.52   | 1.88 | <b>1.01E-22</b> |
| 9       | 0.81 | 0.73   | 0.91 | <b>2.69E-04</b> |
| 10      | 0.98 | 0.88   | 1.09 | 0.69            |
| HES-kOA |      |        |      |                 |
| KSM     | OR   | 95% CI |      | p-value         |
| 1       | 0.92 | 0.87   | 0.97 | <b>1.61E-03</b> |
| 2       | 1.04 | 0.98   | 1.10 | 0.16            |
| 3       | 0.97 | 0.91   | 1.02 | 0.25            |
| 4       | 1.00 | 0.95   | 1.06 | 0.96            |
| 5       | 0.99 | 0.94   | 1.04 | 0.75            |
| 6       | 0.95 | 0.90   | 1.00 | 0.06            |
| 7       | 1.26 | 1.19   | 1.33 | <b>2.76E-17</b> |
| 8       | 1.32 | 1.25   | 1.40 | <b>1.02E-24</b> |
| 9       | 0.90 | 0.85   | 0.95 | <b>2.65E-04</b> |
| 10      | 0.92 | 0.87   | 0.97 | <b>2.89E-03</b> |

Table 3: Association of osteophyte grades with TKR and HES-kOA (n=6,719).

For individual osteophyte grades, hazard ratios (HRs) and odds ratios (ORs) represent the change in risk compared with grade 0 osteophytes. Models were adjusted for age, sex,

height and weight. CI, 95% confidence intervals; HES-kOA, hospital diagnosed knee osteoarthritis; TKR, total knee replacement.

|                      | TKR   |        |       |                        | HES-kOA |        |       |                        |
|----------------------|-------|--------|-------|------------------------|---------|--------|-------|------------------------|
|                      | HR    | 95% CI |       | <i>p</i> -value        | OR      | 95% CI |       | <i>p</i> -value        |
| <b>Medial femur</b>  |       |        |       |                        |         |        |       |                        |
| grade 1              | 2.00  | 1.22   | 3.29  | 0.01                   | 1.43    | 1.09   | 1.87  | 0.01                   |
| grade 2              | 8.79  | 5.21   | 14.82 | $3.35 \times 10^{-16}$ | 5.93    | 4.22   | 8.34  | $1.24 \times 10^{-24}$ |
| grade 3              | 17.55 | 10.05  | 30.65 | $7.04 \times 10^{-24}$ | 8.27    | 5.23   | 13.10 | $2.04 \times 10^{-19}$ |
| <b>Lateral femur</b> |       |        |       |                        |         |        |       |                        |
| grade 1              | 2.35  | 1.21   | 4.60  | 0.01                   | 2.00    | 1.32   | 3.05  | $1.24 \times 10^{-24}$ |
| grade 2              | 9.56  | 5.61   | 16.28 | $1.01 \times 10^{-16}$ | 7.13    | 4.74   | 10.74 | $2.04 \times 10^{-19}$ |
| grade 3              | 11.81 | 6.48   | 21.54 | $8.09 \times 10^{-16}$ | 5.44    | 3.09   | 9.57  | $4.12 \times 10^{-09}$ |
| <b>Medial tibia</b>  |       |        |       |                        |         |        |       |                        |
| grade 1              | 3.45  | 2.24   | 5.31  | $1.81 \times 10^{-08}$ | 2.84    | 2.24   | 3.60  | $8.65 \times 10^{-18}$ |
| grade 2              | 9.82  | 5.44   | 17.72 | $3.35 \times 10^{-14}$ | 5.42    | 3.47   | 8.45  | $9.67 \times 10^{-14}$ |
| grade 3              | 22.12 | 10.04  | 48.74 | $1.55 \times 10^{-14}$ | 14.52   | 6.66   | 31.64 | $1.71 \times 10^{-11}$ |
| <b>Lateral tibia</b> |       |        |       |                        |         |        |       |                        |
| grade 1              | 2.82  | 1.82   | 4.37  | $3.17 \times 10^{-06}$ | 2.01    | 1.59   | 2.54  | $6.47 \times 10^{-09}$ |
| grade 2              | 7.66  | 3.92   | 14.98 | $2.66 \times 10^{-09}$ | 5.81    | 3.71   | 9.09  | $1.38 \times 10^{-14}$ |
| grade 3              | 33.22 | 16.64  | 66.31 | $3.01 \times 10^{-23}$ | 14.53   | 7.22   | 29.21 | $5.97 \times 10^{-14}$ |

Table 4: Predictive performance of B-scores, binary mJSW and osteophyte score with TKR and HES-kOA (n=6,719).

The table includes results of univariable and multivariable models (left), and measures of model fit and discrimination (right). Demographic characteristics include age, sex, height and weight. For B-score, HRs and ORs indicate the change in risk per standard deviation increase in B-score. For mJSW, HRs and ORs reflect the risk difference between the first quartile (on the medial compartment) compared with quartiles two, three, and four.

Osteophyte score was entered into the model as a linear term and therefore HRs and ORs represent the difference in risk per unit increase in score. When evaluating the predictive accuracy of the time-to-event (cox) models we used Harrell's C-index. For logistic regression models, where the outcome was binary, we used the AUC. The most parsimonious model, containing the predictors B-score, osteophyte grade and demographic variables, is shown in bold.

Abbreviations: AIC, Akaike information criterion; AUC, area under the receiver operating characteristic curve; BIC, Bayesian information criterion; CI, 95 % confidence intervals; C-index, Harrell's concordance index; Demo, demographic variables; OP, osteophyte score; HR, hazard ratio; mJSW, minimum joint space width; OR, odds ratio; TKR, total knee replacement.

| TKR                        |      |           |                         |                |                |             |  |
|----------------------------|------|-----------|-------------------------|----------------|----------------|-------------|--|
| model                      | HR   | 95% CI    | p-value                 | AIC            | BIC            | C-stat      |  |
| B-score                    | 2.67 | 2.25 3.17 | 2.86 x10 <sup>-29</sup> | 1808.50        | 1815.31        | 0.75        |  |
| B-score + demo             | 2.40 | 2.00 2.87 | 9.47 x10 <sup>-22</sup> | 1757.53        | 1791.59        | 0.81        |  |
| B-score + demo + mJSW      | 2.29 | 1.89 2.76 | 8.84 x10 <sup>-18</sup> | 1757.45        | 1798.33        | 0.81        |  |
| B-score + demo + OP        | 1.80 | 1.50 2.15 | 2.70 x10 <sup>-10</sup> | <b>1687.85</b> | <b>1728.72</b> | <b>0.87</b> |  |
| B-score + demo + mJSW + OP | 1.72 | 1.42 2.09 | 2.93 x10 <sup>-08</sup> | 1688.39        | 1736.08        | 0.87        |  |
| mJSW                       | 2.81 | 1.94 4.09 | 5.98 x10 <sup>-08</sup> | 1898.62        | 1905.44        | 0.62        |  |
| mJSW + demos               | 2.29 | 1.54 3.41 | 4.50 x10 <sup>-05</sup> | 1829.75        | 1863.81        | 0.77        |  |
| mJSW + demos + B-score     | 1.36 | 0.90 2.05 | 0.15                    | 1757.45        | 1798.33        | 0.81        |  |
| mJSW + demos + OP          | 1.91 | 1.29 2.82 | 1.13 x10 <sup>-03</sup> | 1718.01        | 1758.89        | 0.86        |  |
| mJSW + demo + B-score + OP | 1.29 | 0.85 1.96 | 0.23                    | 1688.39        | 1736.08        | 0.87        |  |
| OP                         | 3.42 | 2.78 4.19 | 8.16 x10 <sup>-32</sup> | 1761.45        | 1768.26        | 0.80        |  |
| OP + demo                  | 2.92 | 2.37 3.60 | 8.54 x10 <sup>-24</sup> | 1726.42        | 1760.48        | 0.85        |  |
| OP + demo + B-score        | 2.35 | 1.90 2.90 | 3.33 x10 <sup>-15</sup> | <b>1687.85</b> | <b>1728.72</b> | <b>0.87</b> |  |
| OP + demo + mJSW           | 2.82 | 2.30 3.48 | 9.26 x10 <sup>-23</sup> | 1718.01        | 1758.89        | 0.86        |  |
| OP + demo + B-score + mJSW | 2.34 | 1.89 2.89 | 4.19 x10 <sup>-15</sup> | 1688.39        | 1736.08        | 0.87        |  |
| HES-kOA                    |      |           |                         |                |                |             |  |
| model                      | OR   | 95% CI    | p-value                 | AIC            | BIC            | AUC         |  |
| B-score                    | 1.98 | 1.78 2.20 | 1.73 x10 <sup>-36</sup> | 2564.08        | 2577.70        | 0.68        |  |
| B-score + demo             | 1.85 | 1.66 2.07 | 6.99 x10 <sup>-28</sup> | 2527.02        | 2567.90        | 0.71        |  |
| B-score + demo + mJSW      | 1.82 | 1.63 2.04 | 2.63 x10 <sup>-25</sup> | 2527.82        | 2575.51        | 0.71        |  |
| B-score + demo + OP        | 1.59 | 1.42 1.77 | 4.84 x10 <sup>-16</sup> | <b>2422.33</b> | <b>2470.02</b> | <b>0.75</b> |  |
| B-score + demo + mJSW + OP | 1.57 | 1.40 1.76 | 1.98 x10 <sup>-14</sup> | 2423.51        | 2478.01        | 0.75        |  |
| mJSW                       | 1.65 | 1.31 2.07 | 1.97 x10 <sup>-05</sup> | 2707.38        | 2721.01        | 0.55        |  |
| mJSW + demo                | 1.55 | 1.21 1.98 | 4.61 x10 <sup>-04</sup> | 2636.44        | 2677.31        | 0.65        |  |
| mJSW + demo + B-score      | 1.15 | 0.89 1.48 | 0.27                    | 2527.82        | 2575.51        | 0.71        |  |
| mJSW + demo + OP           | 1.44 | 1.13 1.84 | 3.78 x10 <sup>-03</sup> | 2481.69        | 2529.38        | 0.73        |  |
| mJSW + demo + B-score + OP | 1.13 | 0.87 1.46 | 0.36                    | 2423.51        | 2478.01        | 0.75        |  |
| OP                         | 2.19 | 1.97 2.44 | 0.00E+00                | 2513.93        | 2527.56        | 0.70        |  |
| OP + demo                  | 2.02 | 1.81 2.26 | 1.33 x10 <sup>-35</sup> | 2487.86        | 2528.73        | 0.73        |  |
| OP + demo + B-score        | 1.80 | 1.60 2.01 | 2.70 x10 <sup>-24</sup> | <b>2422.33</b> | <b>2470.02</b> | <b>0.75</b> |  |
| OP + demo + mJSW           | 2.00 | 1.79 2.24 | 7.83 x10 <sup>-35</sup> | 2481.69        | 2529.38        | 0.73        |  |
| OP + demo + B-score + mJSW | 1.79 | 1.60 2.01 | 3.18 x10 <sup>-24</sup> | 2423.51        | 2478.01        | 0.75        |  |

## Figures

### Figure 1: Flow Diagram of Participant Progression through the Study.

At the time of the analysis, approximately 39,000 left knee DXA scans were available. DXA images underwent a comprehensive assessment to determine their suitability for inclusion in the SSM. Reasons for exclusion included: poor image quality, artefacts, positioning issues, short femoral or tibial shafts, and search failure.

A total of 220 participants withdrew from the study, and an additional 80 participants were excluded due to having undergone TKR on the contralateral knee before obtaining the DXA image of the left knee.

All participants in the analytic dataset had SSM data available, which was used to derive B-score and minimum joint space width (mJSW). Within this dataset, a sub-sample of 6,719 participants had additional osteophyte data available. This sub-sample, comprising participants with B-scores, mJSW and osteophyte data, were used to develop an imaging biomarker for predicting TKR.

Abbreviations: QC, quality control; SSM, statistical shape model; TKR, total knee replacement; UKB, UK Biobank.

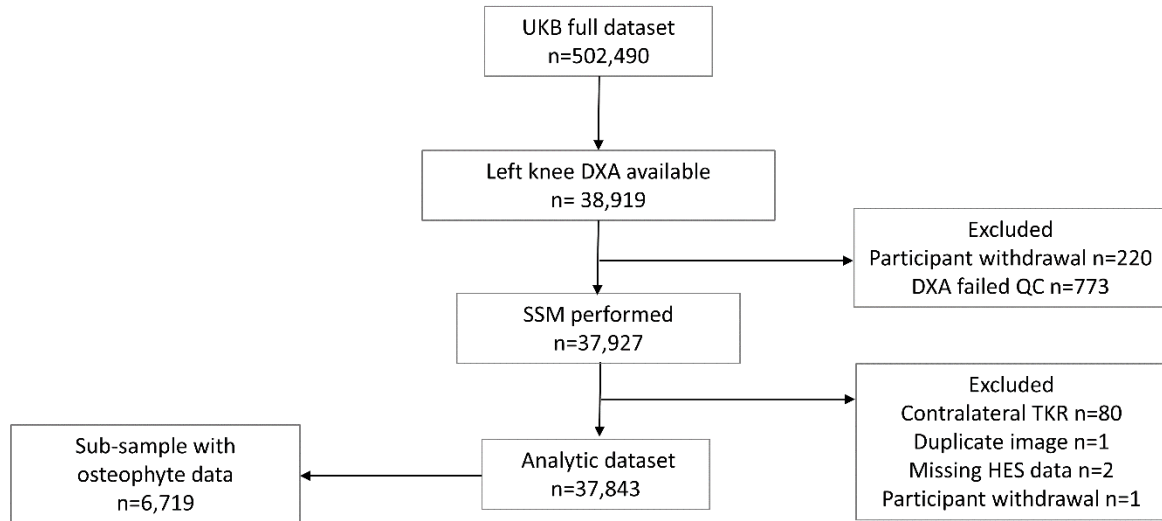

Figure 2: Association of B-scores, osteophyte score and mJSW with TKR and HES-kOA.

The associations of B-score, mJSW, and osteophyte score with total knee replacement (TKR) are presented in the top panel, while the corresponding associations with hospital diagnosed knee osteoarthritis (HES-kOA) are displayed in the bottom panel. For B-score, the hazard ratios (HRs) and odds ratios (ORs) quantify the difference in risk associated with a standard deviation (SD) increase in the score. Regarding mJSW, the HRs and ORs represent the change in risk for individuals in the second, third, or fourth quartile of mJSW in the medial compartment, compared with those in the first quartile. For osteophyte score, (based on the sum of osteophyte grades), the HRs and ORs represent the difference in risk per unit increase in score.



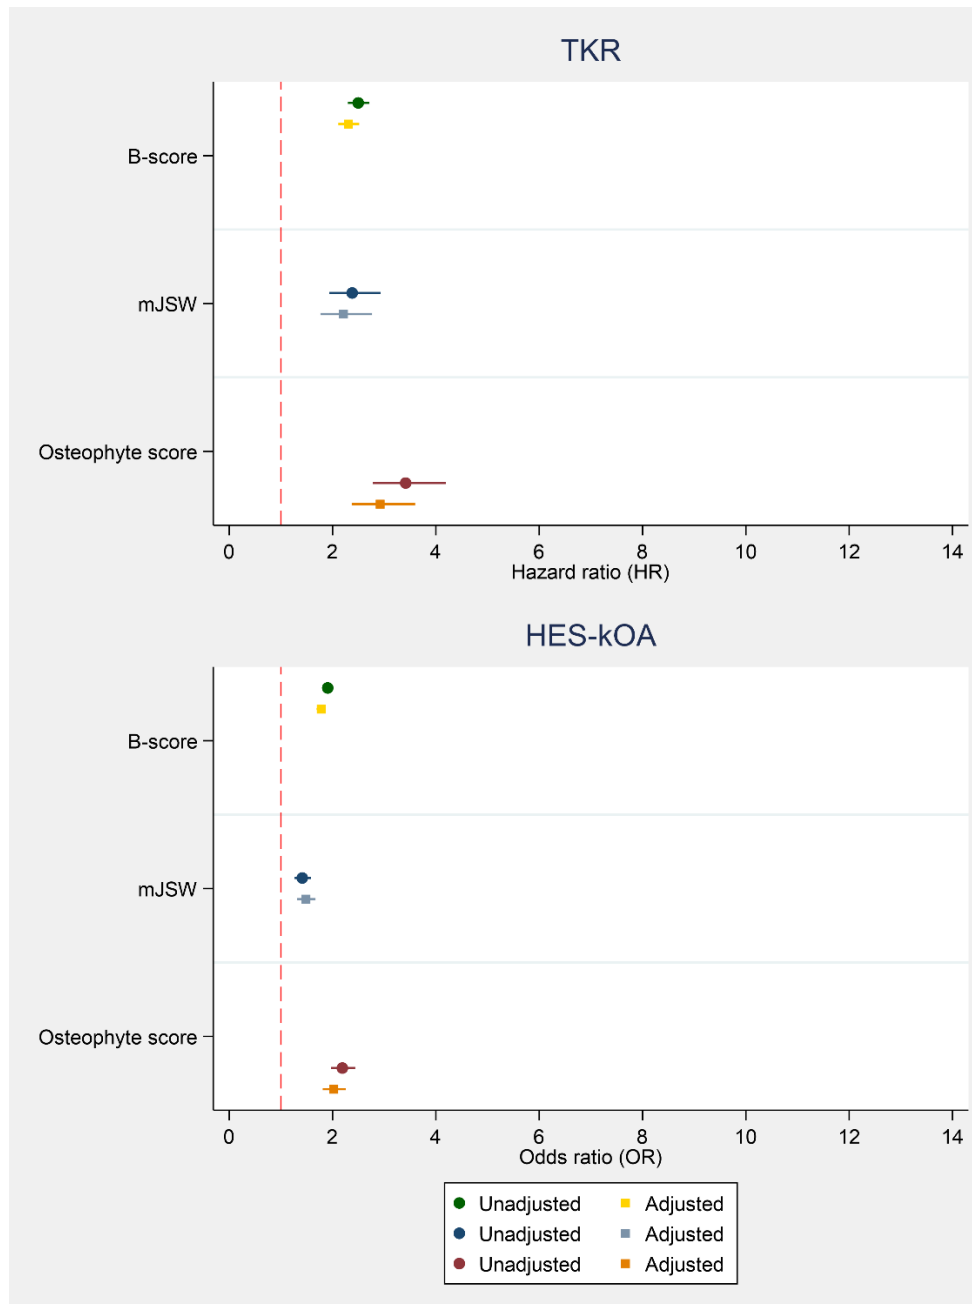

Figure 3: Examples of differences in bone shape corresponding to an increase and decrease in B-scores.

B-scores were obtained by projecting all statistical knee shape modes (KSMs) onto a vector connecting healthy and diseased knee joint shapes. The diseased population included individuals who underwent TKR (left) or had hospital-diagnosed knee osteoarthritis (HES-KOA) (right). The figure illustrates shape changes associated with  $\pm 2$  standard deviations (SD) from the mean B-score. The solid blue line depicts the shape at -2SD, while the dashed red line represents the shape at +2SD.

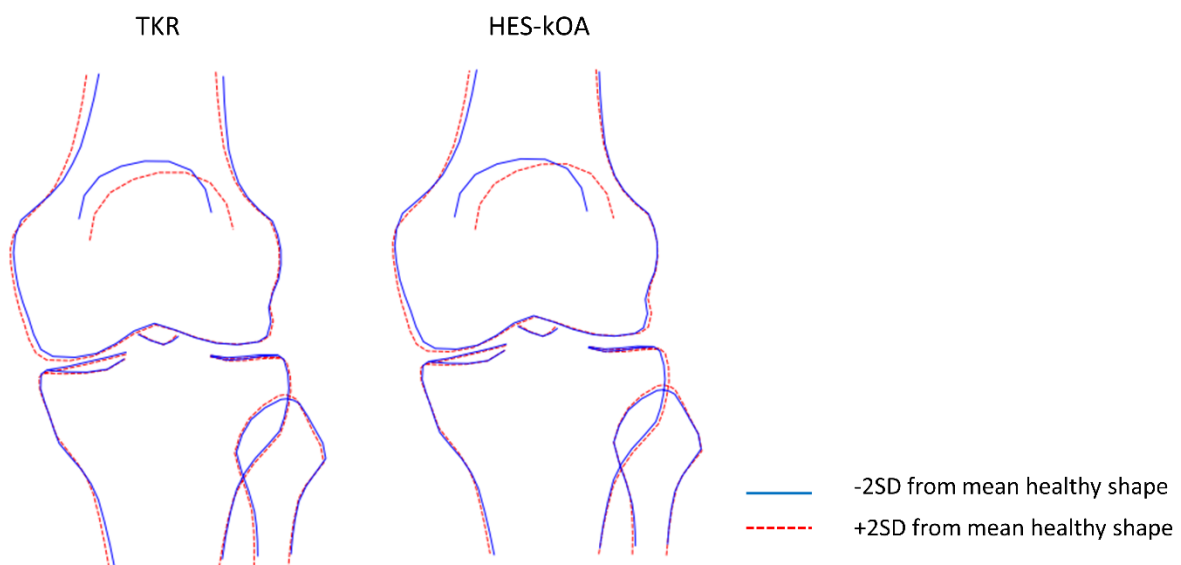

**Figure 4: Receiver Operating Characteristic (ROC) Curve for Prediction of HES-kOA and TKR at 5 Years (n=6,719).**

Model 1: age, sex, height, and weight; Model 2: age, sex, height, weight, B-score; Model 3: age, sex, height, weight, binary osteophyte grade; Model 4: age, sex, height, weight, B-score, binary osteophyte grade. Abbreviation: AUC, area under the receiver operating characteristic curve.

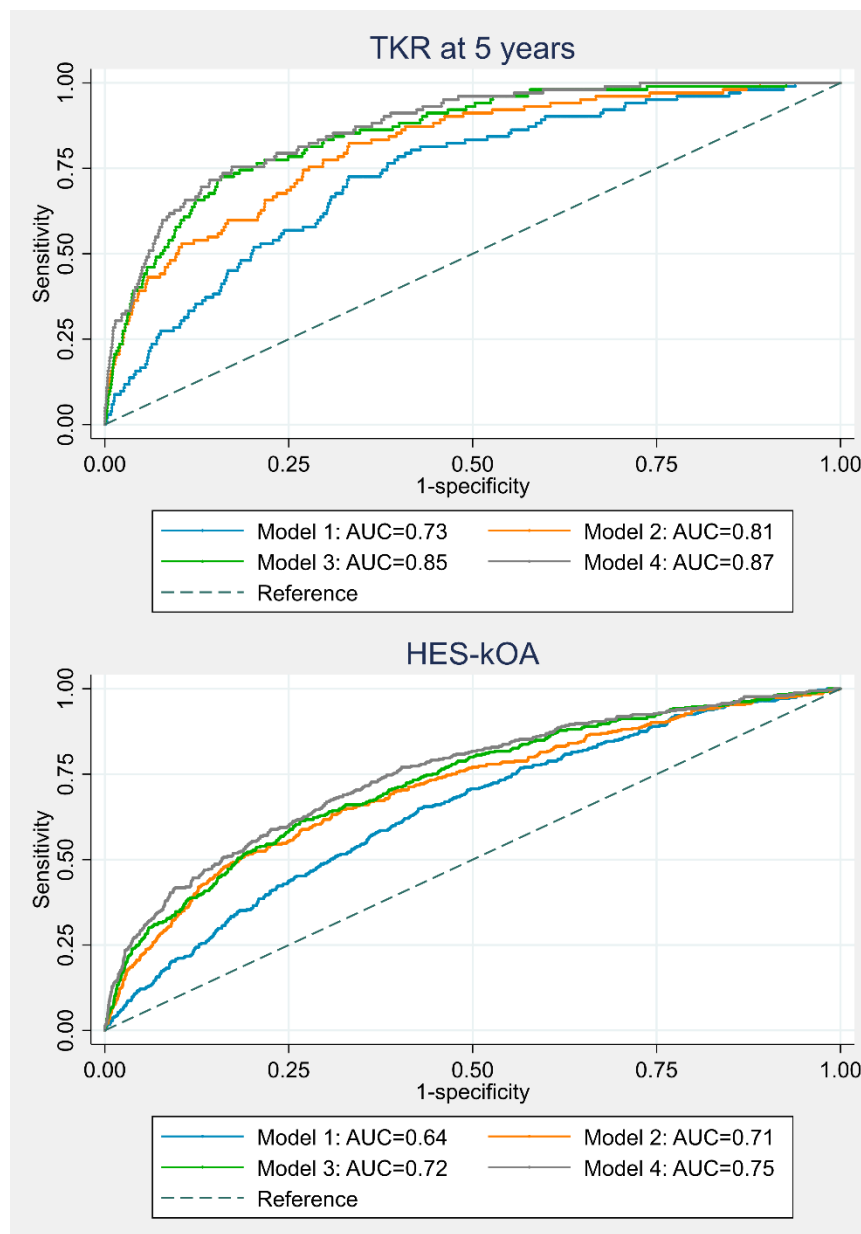

Source: https://medrxiv.org/content/10.1101/2024.01.04.24300833.full.pdf
